# Supplementary material for: Molecular mechanism behind the cholinium-taurate ionic liquid in stabilisation of HDAC2 for alcohol use disorders: insights from DFT and MD simulations
Source: Royal Society of Chemistry journal article supplement (doi:10.1039/d4cp04535a), 2025-01-01
Supplement: d4cp04535a1.pdf [file d4cp04535a1.pdf]

-- Electronic Supplementary Information --

## Molecular Mechanism behind Cholinium-Taurate Ionic Liquid in Stabilisation of HDAC2 for Alcohol Use Disorders: Insights from DFT and MD Simulations

S. M. Esther Rubavathy,<sup>†</sup> Gopal Hema<sup>†</sup> and M. Prakash<sup>†,\*</sup>

<sup>†</sup> Computational Chemistry Research Laboratory (CCRL), Department of Chemistry, SRM Institute of Science and Technology, Kattankulathur-603 203, Chengalpattu, Tamil Nadu, India.

### Table of Contents

#### Figures

**Fig. S1** Hoffmeister series of anions and cations for protein stabilisation and destabilisation.

**Fig. S2** Optimized geometries of the IL-water clusters with bond distances in Å.

**Fig. S3** NCI plots of [Cho]<sup>+</sup>[Tau]<sup>-</sup>-W<sub>n</sub> clusters (n = 1-5), with the blue and green shaded areas denoting, respectively, strong and weak interactions.

**Fig. S4** AIM analysis topography of hydrated ILS clusters with isomers.

**Fig. S5** RDG plots of hydrated ILS clusters with isomers.

**Fig. S6** ESP plots of different mole fractions of ILS.

**Fig. S7** FMO plots of different mole fractions of ILS.

**Fig. S8** DOS plots of different mole fractions of ILS.

**Fig. S9** RMSD plots of different mole fractions of ILS.

**Fig. S10** RMSF plots of different mole fractions of ILS.

**Fig. S11** Rg plots of different mole fractions of ILS.

**Fig. S12** PCA plots of different mole fractions of ILS.

**Fig. S13** DCCM plots of apo-protein with different mole fractions of ILS

**Fig. S14** Contact map plots of apo-protein with different mole fractions of ILS

**Fig. S15** The accumulation of water and [Cho]<sup>+</sup>[Tau]<sup>-</sup> of ILS on HDAC2's first solvation shell

**Fig. S16** Ramachandran plots of apo-protein with different mole fractions of ILS (a) Protein-water

**Fig. S17** The H-bonding interaction of different mole fractions of ILS.

**Fig. S18** The RDFs of oxygen (O1, O2 & O3) atoms [Tau]<sup>-</sup> ions, with the COM of water molecules at 0.80 and 1.00-mole fractions of ILs.

**Fig. S19** Secondary Structure analysis confirms that the turn in the protein without ILs transformed into a helix.

**Fig. S20** Secondary Structure analysis confirms that the helix in the protein without ILs transformed into a turn.

**Fig. S21** Secondary Structure analysis confirms that the turn in the protein without ILs transformed into a helix.

**Fig. S22** Secondary Structure analysis confirms that the turn in the protein without ILs transformed into a helix.

**Fig. S23.** The average plots of different mole fractions of ILs with ethanol

### **Tables**

**Table S1.** The binding energy of the ILs -Water systems with dispersion correction by DFT studies.

**Table S2.** The values of the computed total electron density ( $\rho(r_c)$ ) and the total Laplacian electron density ( $\nabla^2\rho(r_c)$ ) for each complex.

**Table S3.** Chemical reactivity of the [Cho]<sup>+</sup>[Tau]<sup>-</sup> IL systems.

**Table S4.** The average values of RMSD, RMSF, and Rg of apoprotein with water and different mole fractions of ILs.

**Table S5.** The quantity of water molecules and [Cho]<sup>+</sup>[Tau]<sup>-</sup> ILs that accumulated on HDAC2's first solvation shell.

**Table S6.** The average value of the number of H-bonds between HDAC2 and different mole fractions of [Cho]<sup>+</sup>[Tau]<sup>-</sup> IL.

**Table S7.** The average number of H-bonds between water and different mole fractions of [Cho]<sup>+</sup>[Tau]<sup>-</sup> ILs.

**Table S8.** The average number of H-bonds between HDAC2 and water.

**Table S9.** The first and second peak values of RDF graphs.

**Table S10.** The ternary mixture of ethanol and [Cho]<sup>+</sup>[Tau]<sup>-</sup> ILs in water containing HDAC2.

**Table S11.** The average values of RMSD, RMSF, and Rg of apoprotein with water, different mole fraction of ILs and ethanol.

**Table S12.** The dihedral angles phi and psi values for different mole fractions of IL

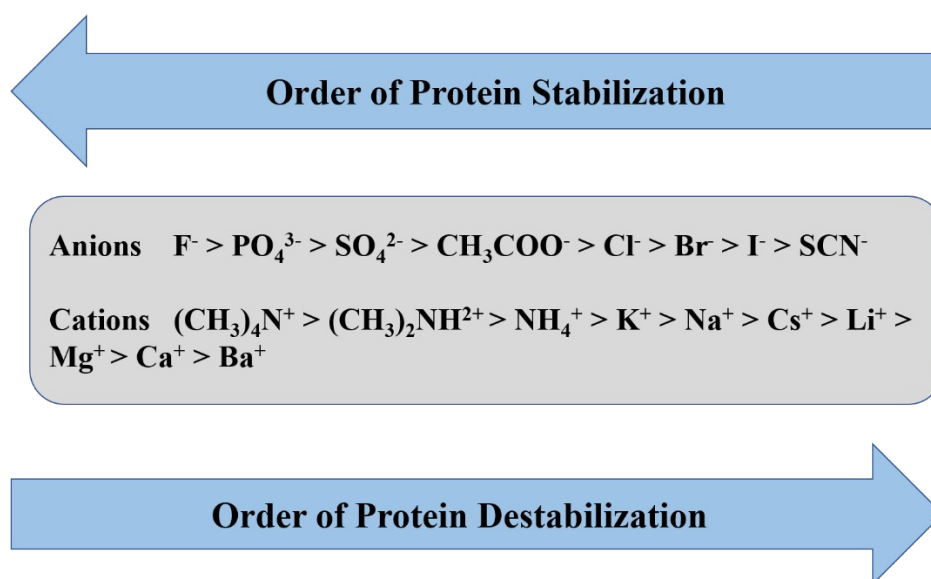

**Fig. S1** Hoffmeister series of anions and cations for protein stabilisation and destabilisation.

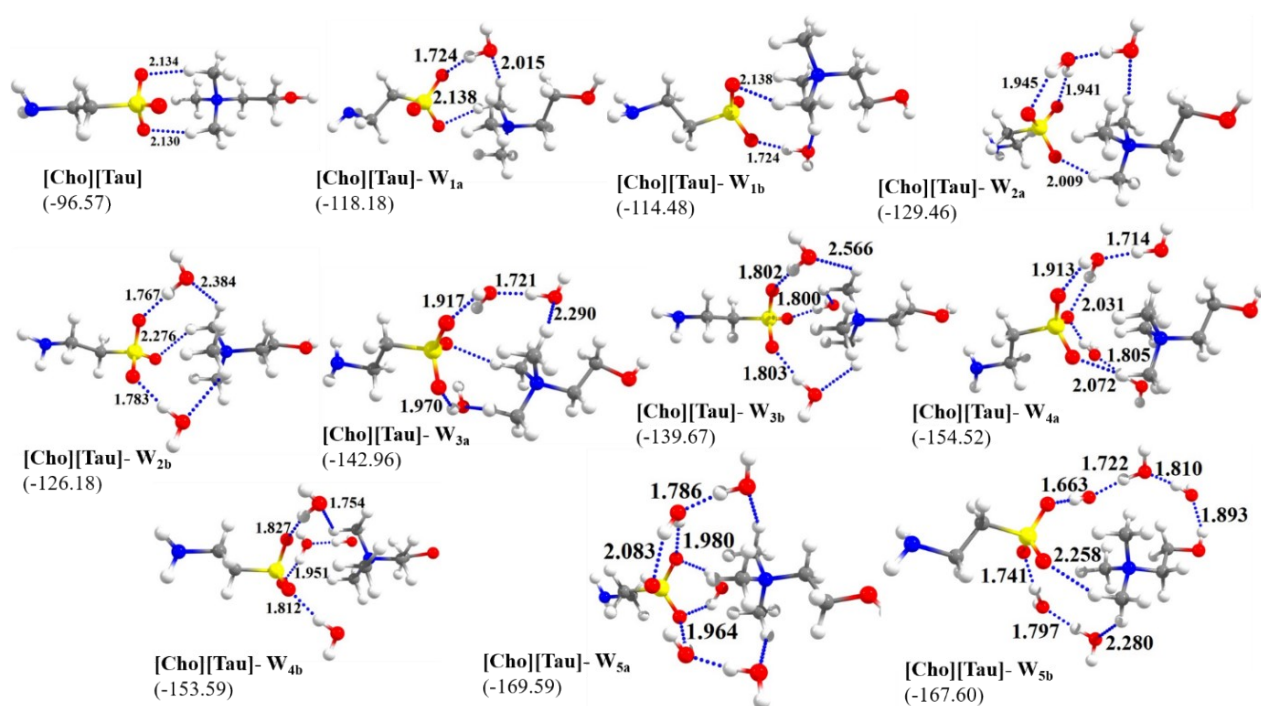

**Fig. S2** Optimized geometries of the IL-water clusters with bond distances in Å.

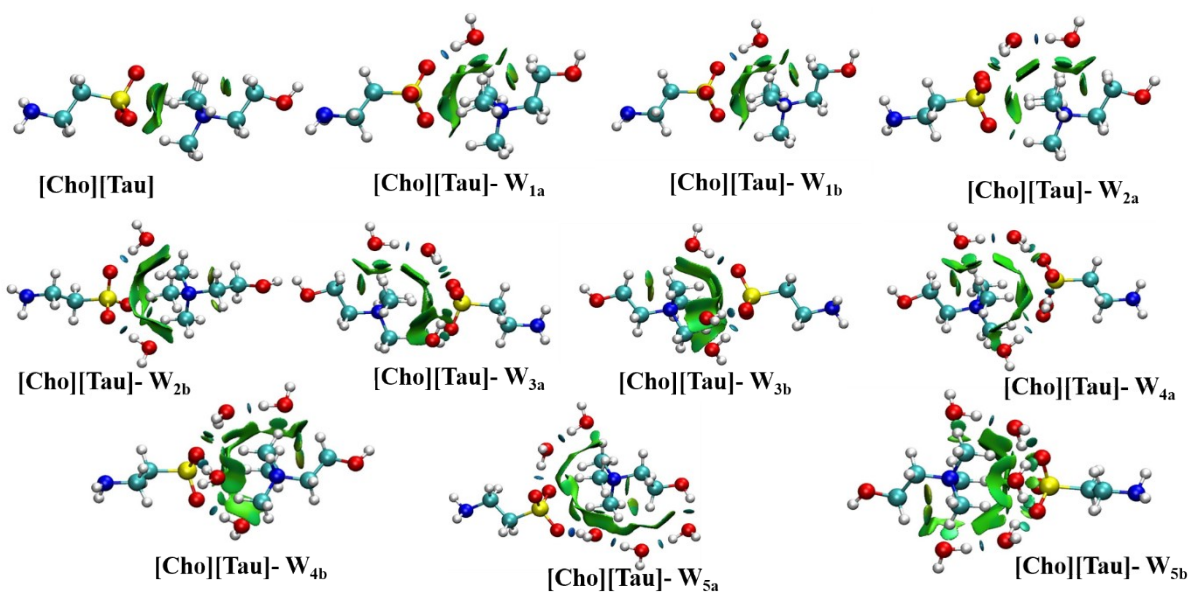

**Fig. S3** NCI plots of  $[\text{Cho}]^+[\text{Tau}]^- - W_n$  clusters ( $n = 1-5$ ), with the blue and green shaded areas denoting, respectively, strong and weak interactions.

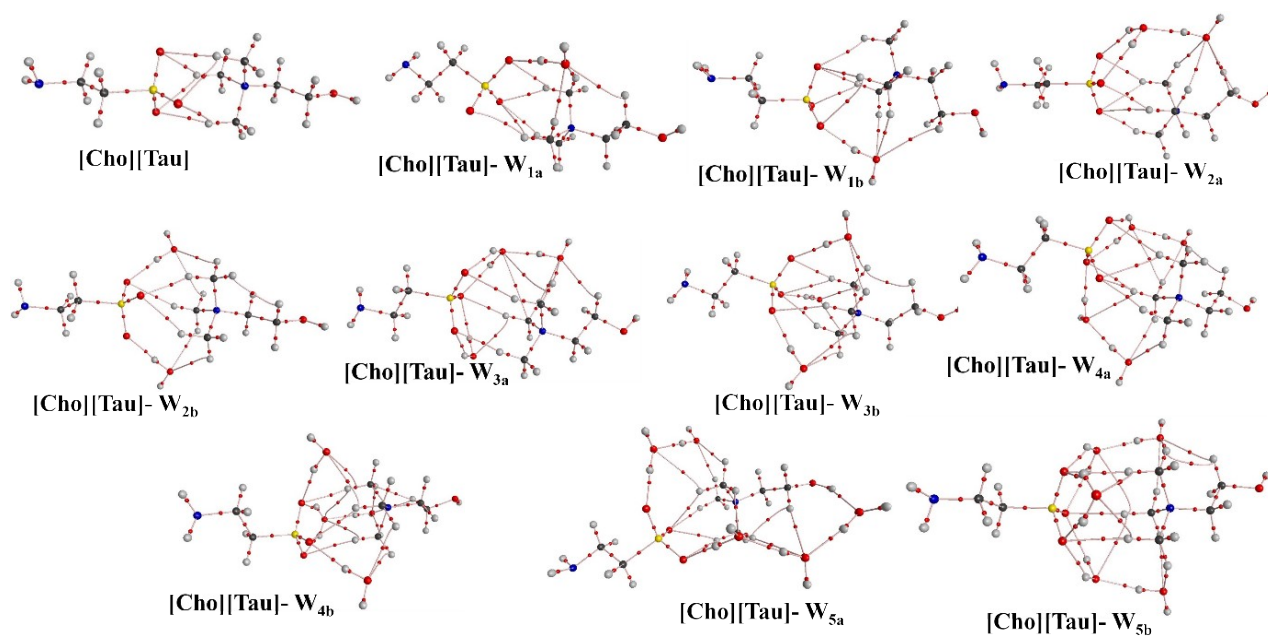

**Fig. S4** AIM analysis topography of hydrated ILS clusters with isomers.

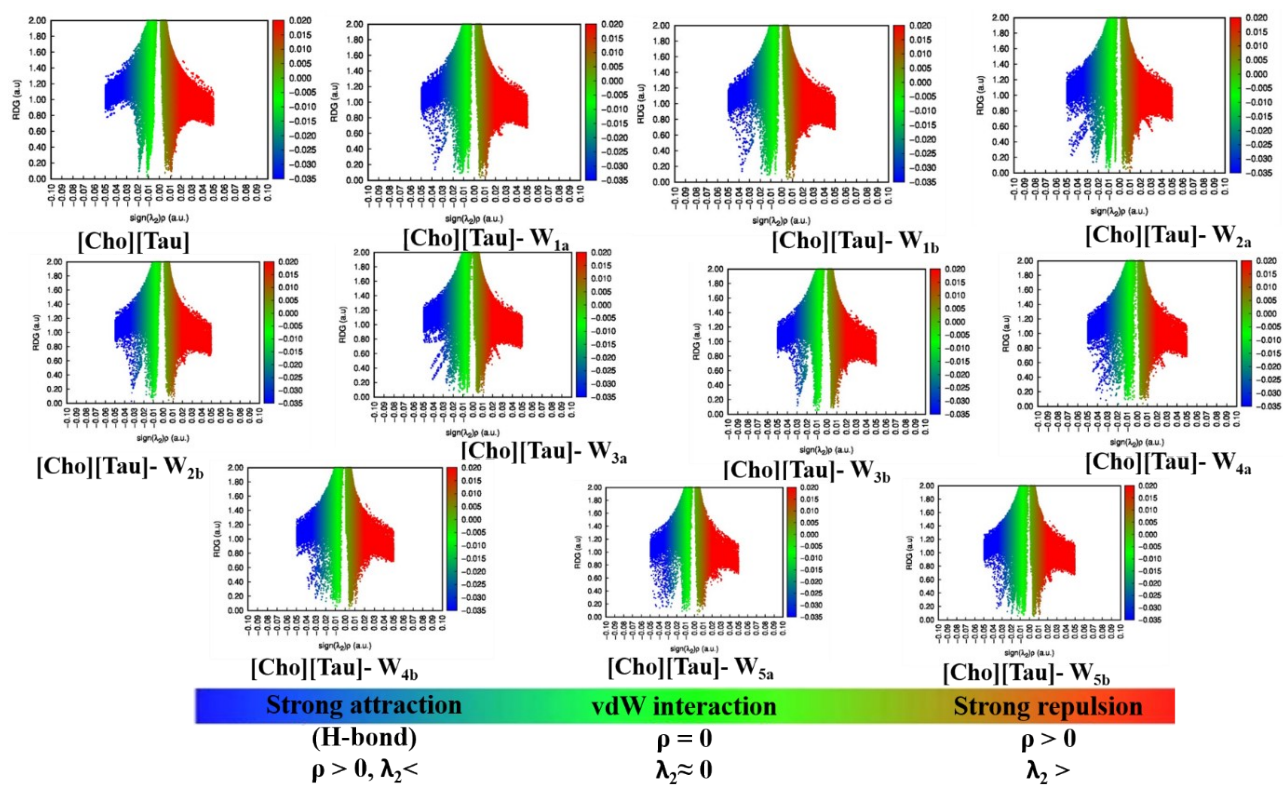

Fig. S5 RDG plots of hydrated ILS clusters with isomers.

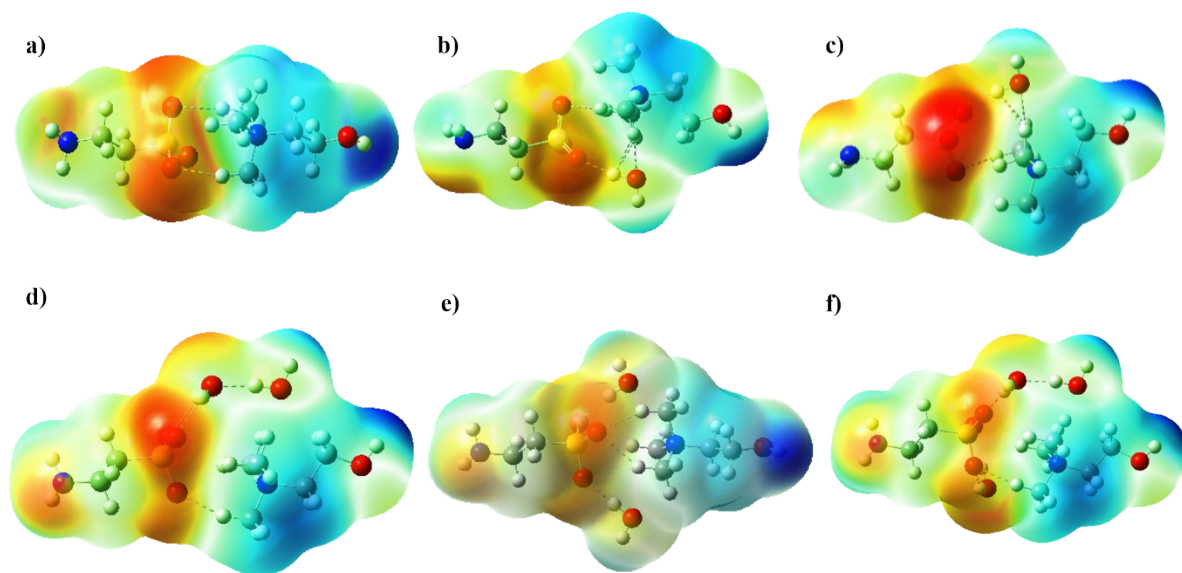

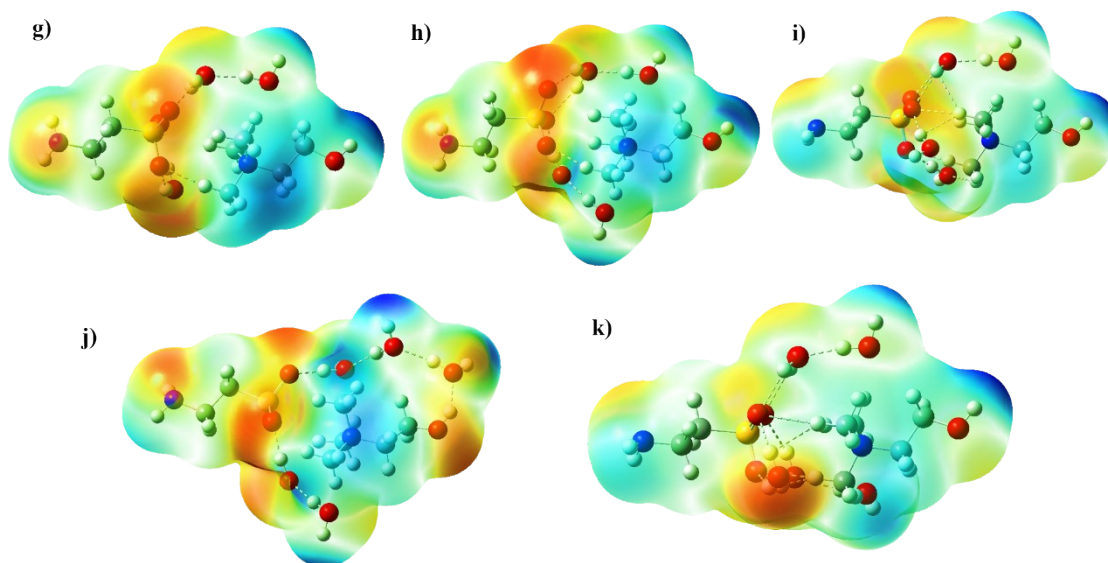

**Fig. S6** MESP contour plots for a) IL-without water b)[Cho][Tau] IL- W<sub>1a</sub> c) [Cho][Tau] IL- W<sub>1b</sub> d) [Cho][Tau] IL- W<sub>2a</sub> e) [Cho][Tau] IL- W<sub>2b</sub> f) [Cho][Tau] IL- W<sub>3a</sub> g) [Cho][Tau] IL- W<sub>3b</sub> h) [Cho][Tau] IL- W<sub>4a</sub> i) [Cho][Tau] IL- W<sub>4b</sub> j)[Cho][Tau] IL- W<sub>5a</sub> k) [Cho][Tau] IL- W<sub>5b</sub>

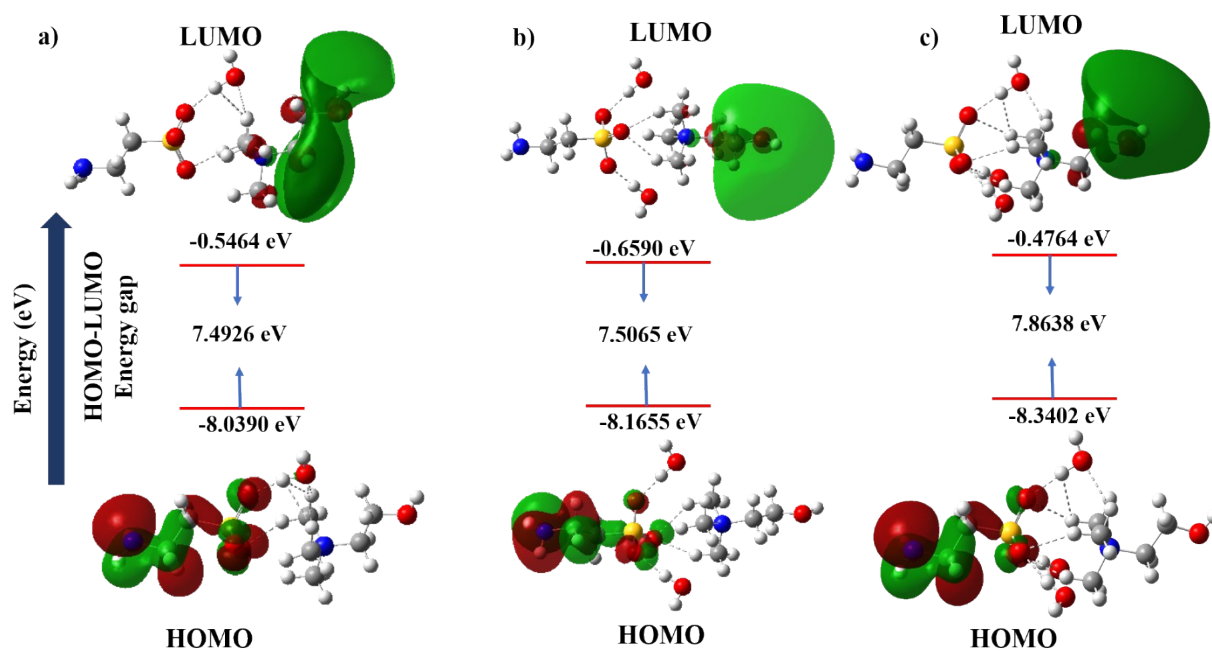

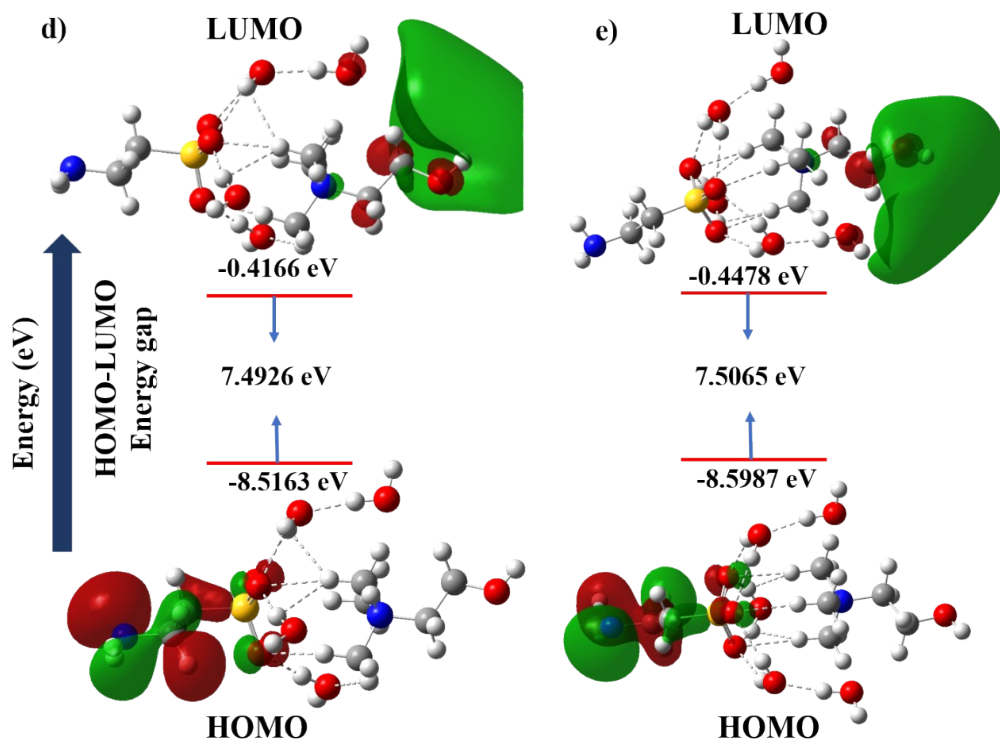

**Fig. S7** FMOs including energies of HOMO and LUMO of a) [Cho][Tau] IL- W1b b) [Cho][Tau] IL- W2b c) [Cho][Tau] IL- W3b d) [Cho][Tau] IL- W4b e) [Cho][Tau] IL- W5b

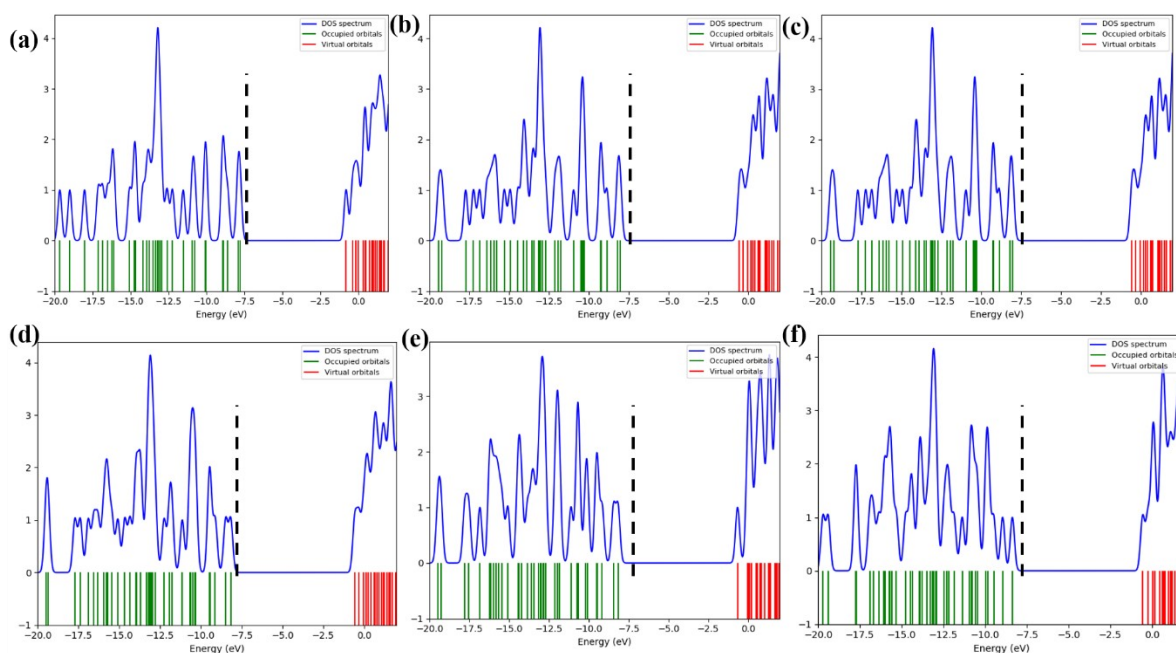

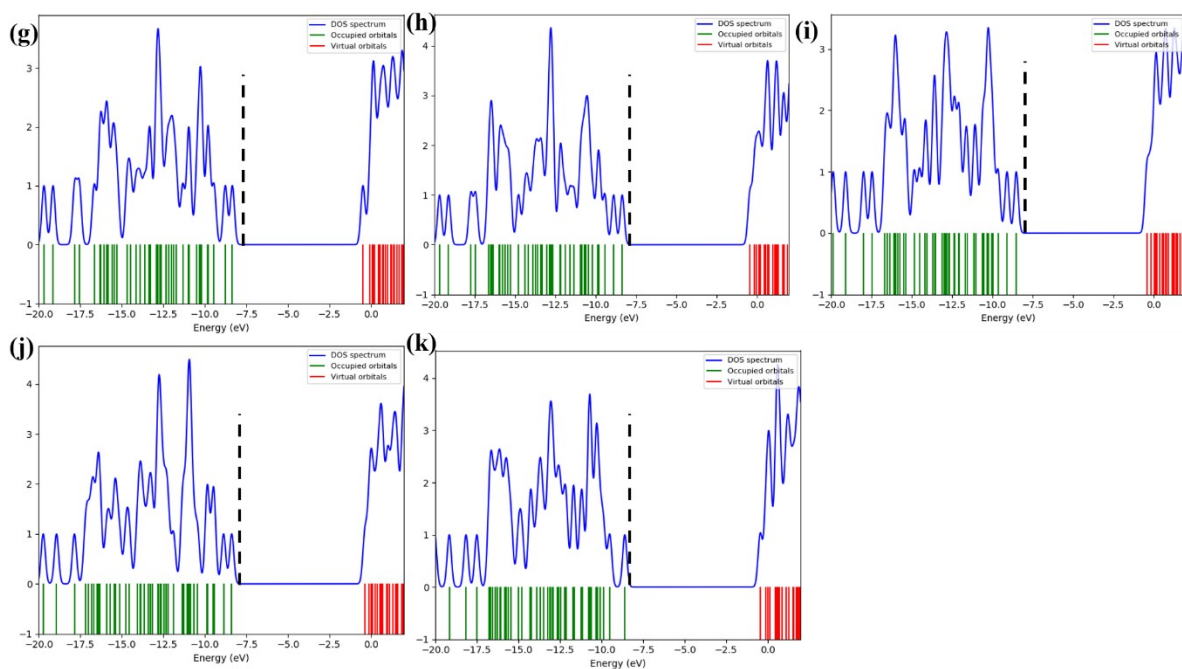

**Fig. S8** DOS plots for a) IL-without water b)[Cho][Tau] IL- W1a c) [Cho][Tau] IL- W1b d) [Cho][Tau] IL- W2a e) [Cho][Tau] IL- W2b f) [Cho][Tau] IL- W3a g) [Cho][Tau] IL- W3b h) [Cho][Tau] IL- W4a i) [Cho][Tau] IL- W4b j)[Cho][Tau] IL- W5a k) [Cho][Tau] IL- W5b

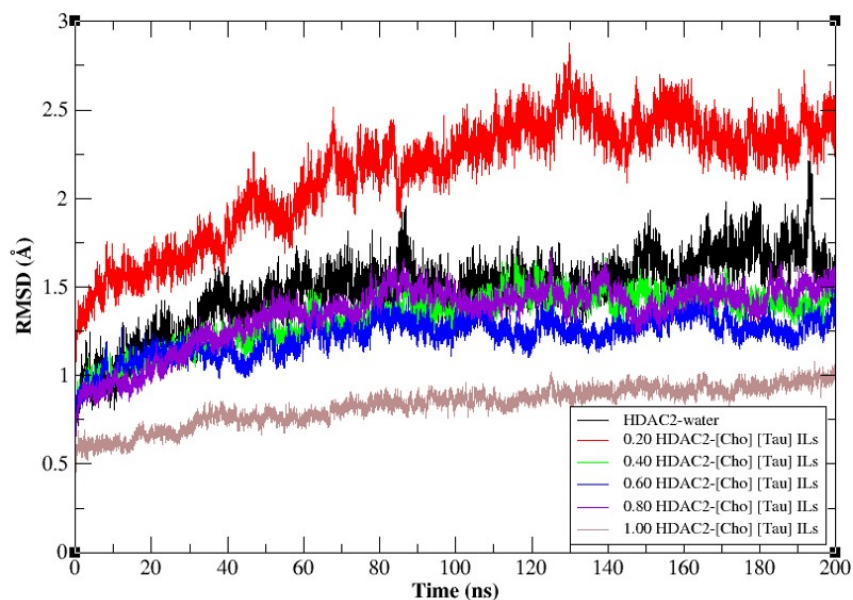

**Fig. S9** RMSD plots of different mole fractions of ILs (a) Protein-water, 0.20, 0.40 and 0.60 ILs (b) 0.80 and 1.00 ILs.



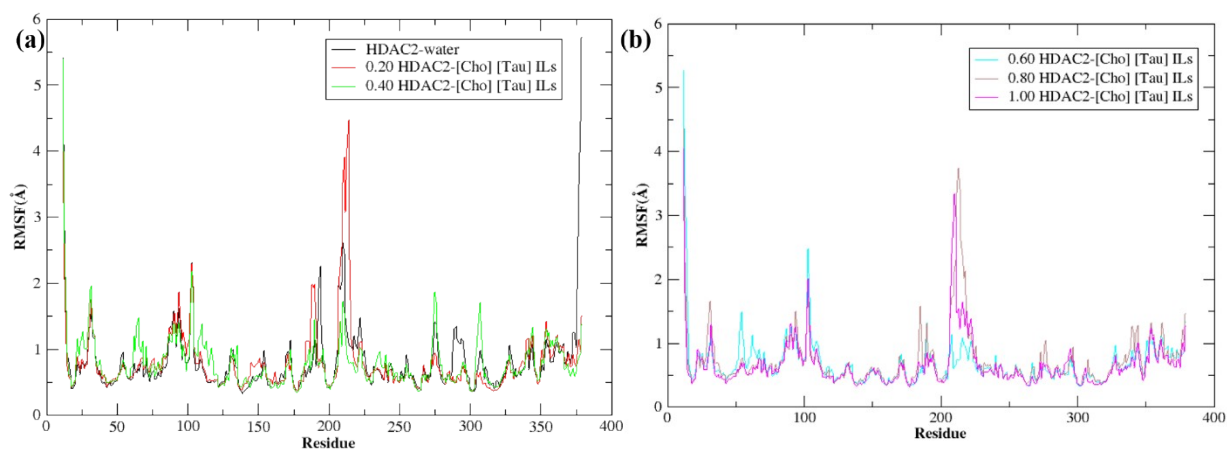

**Fig. S10** RMSF plots of different mole fractions of ILs (a) Protein-water, 0.20 and 0.40 ILs (b) 0.60, 0.80 and 1.00 ILs.

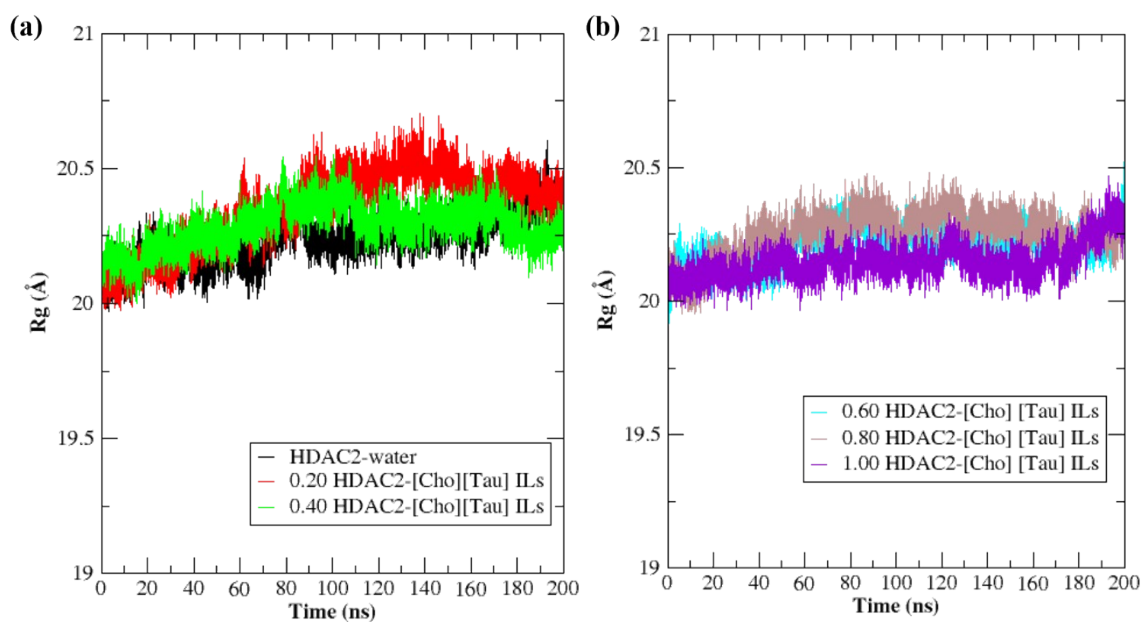

**Fig. S11** Rg plots of different mole fractions of ILs (a) Protein-water, 0.20 and 0.40 ILs (b) 0.60, 0.80 and 1.00 ILs.

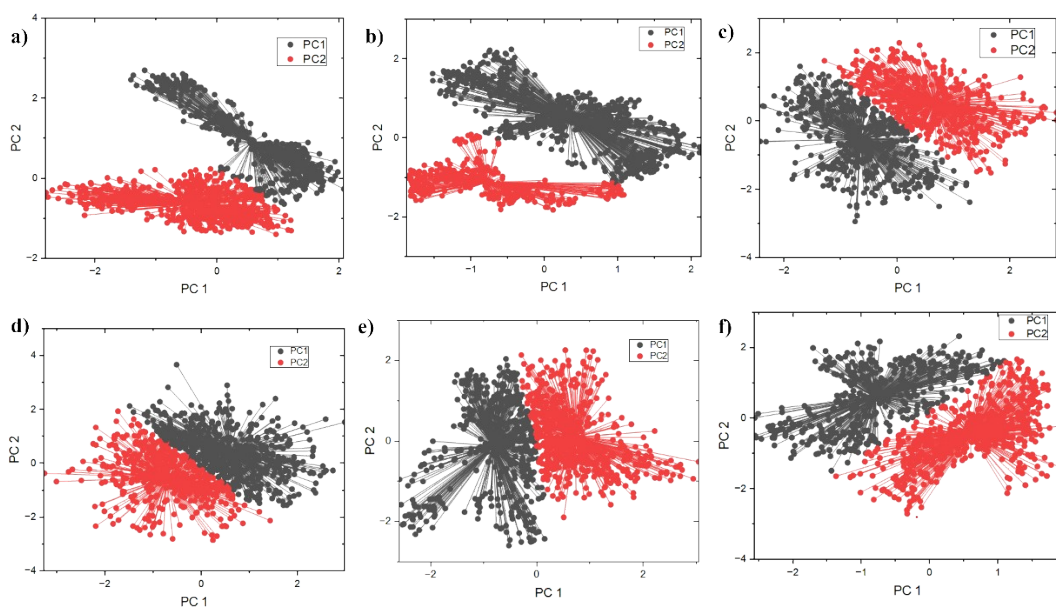

**Fig. S12** PCA plots of apo-protein with different mole fractions of ILs (a) Protein-water, (b) 0.20, (c) 0.40, (d) 0.60, (e) 0.80, and (f) 1.00.

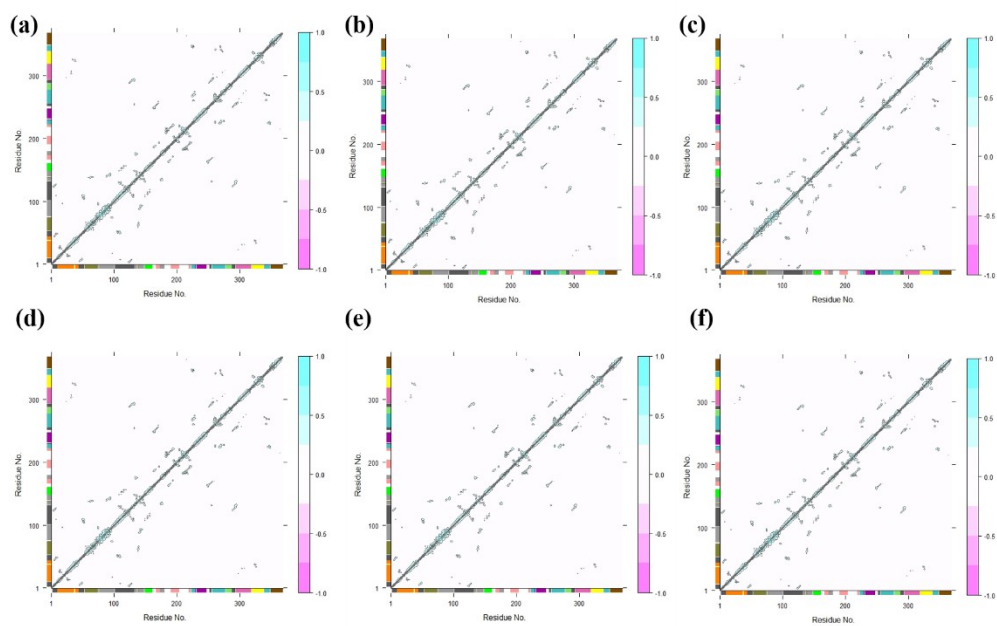

**Fig. S13** DCCM plots of apo-protein with different mole fractions of ILs (a) Protein-water, (b) 0.20, (c) 0.40, (d) 0.60, (e) 0.80, and (f) 1.00.

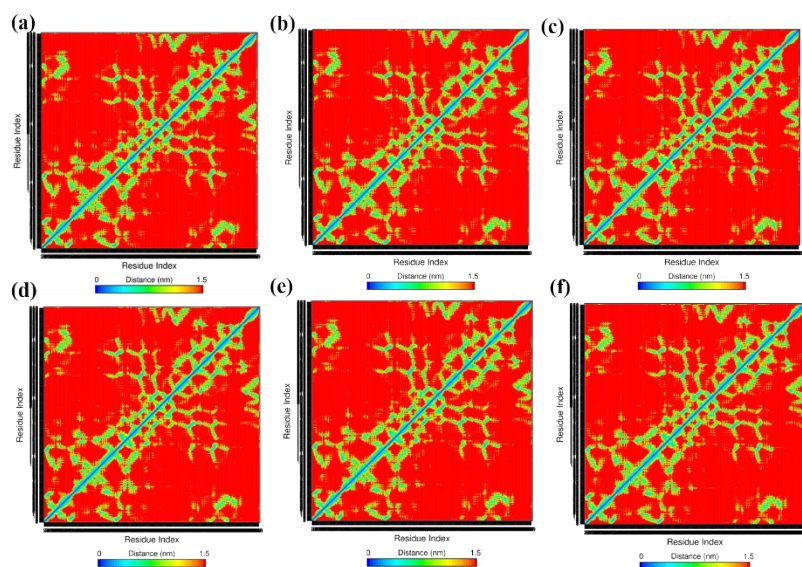

**Fig. S14** Contact map plots of apo-protein with different mole fractions of ILs (a) Protein-water, (b) 0.20, (c) 0.40, (d) 0.60, (e) 0.80, and (f) 1.00.

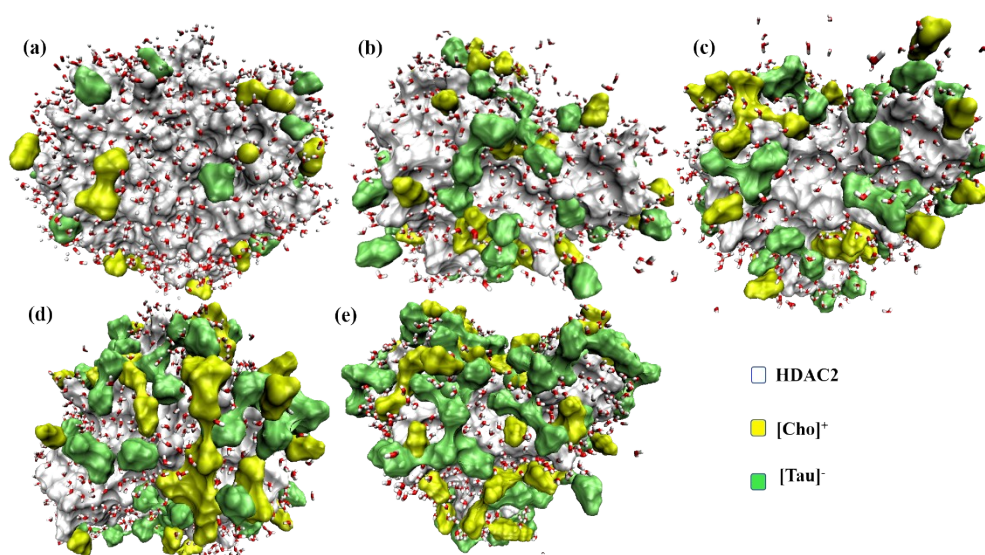

**Fig. S15** The accumulation of water and  $[\text{Cho}]^+[\text{Tau}]^-$  of ILs on HDAC2's first solvation shell at (a) 0.20, (b) 0.40, (c) 0.60, (d) 0.80, and (e) 1.00 mole fractions.

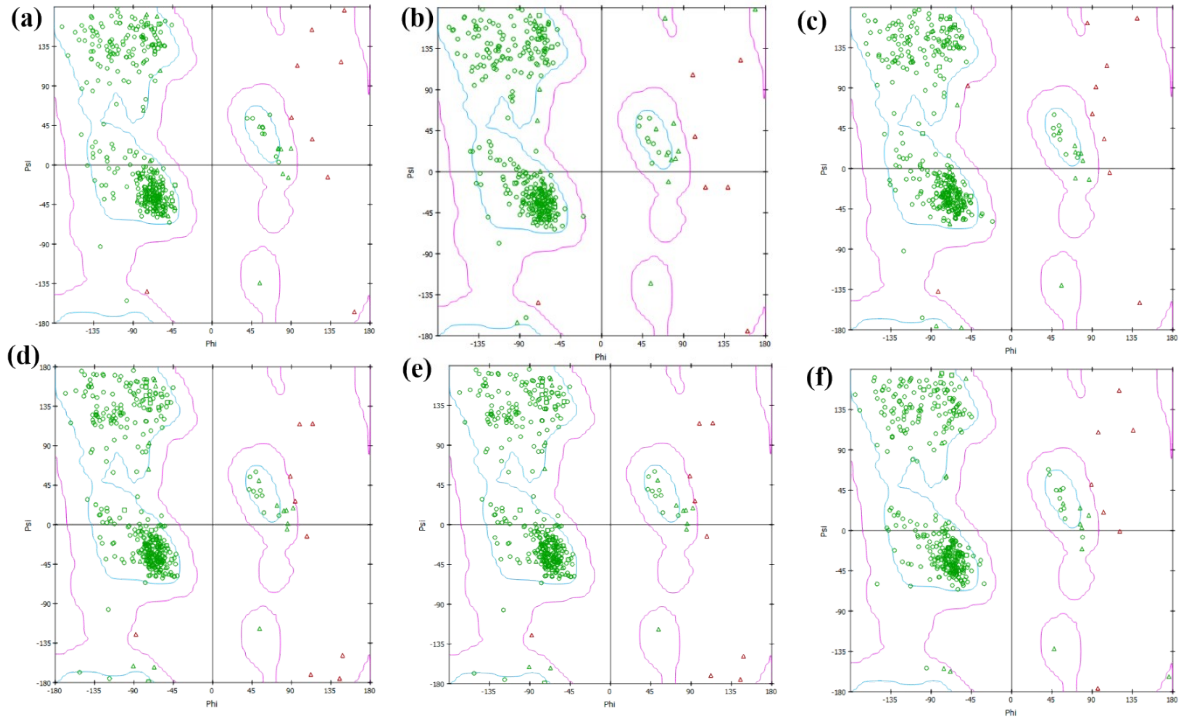

**Fig. S16** Ramachandran plots of apo-protein with different mole fractions of ILs (a) Protein-water, (b) 0.20, (c) 0.40, (d) 0.60, (e) 0.80, and (f) 1.00.

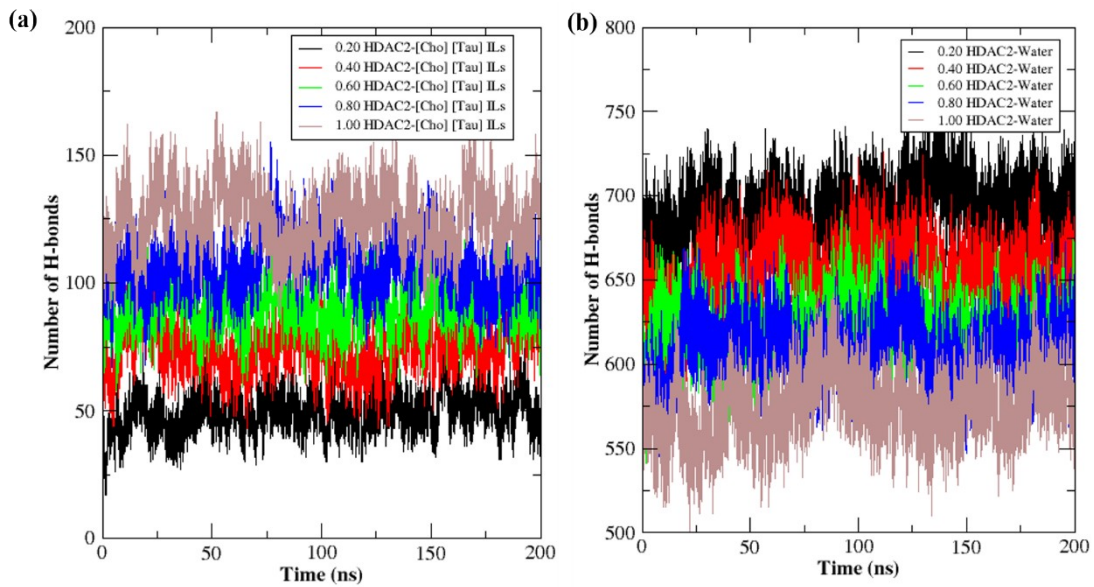

**Fig. S17** The H-bonding interaction of different mole fractions of ILs a) Protein with ILs b) protein with water

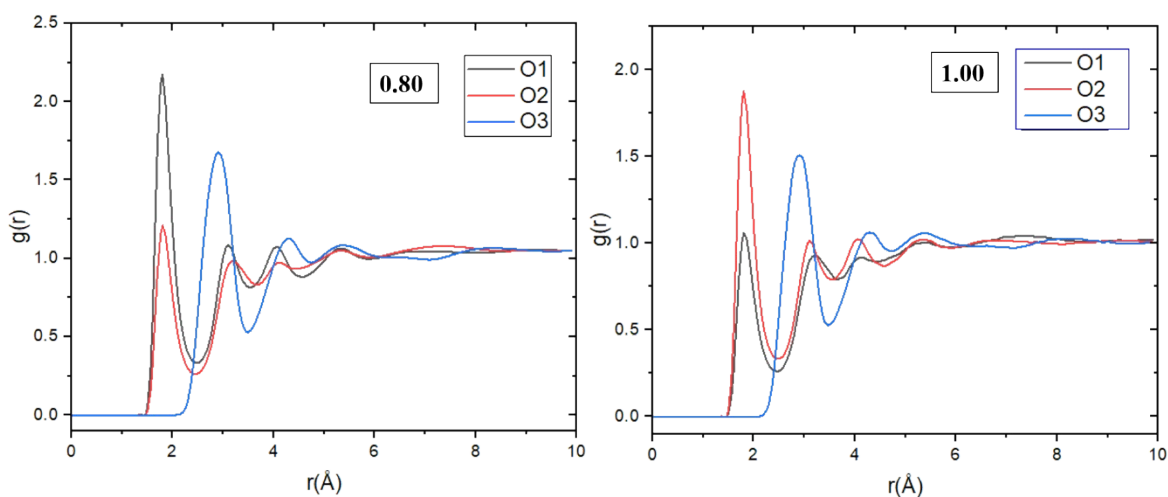

**Fig. S18** The RDFs of oxygen (O1, O2 & O3) atoms  $[\text{Tau}]^-$  ions, with the COM of water molecules at 0.80 and 1.00-mole fractions of ILs.

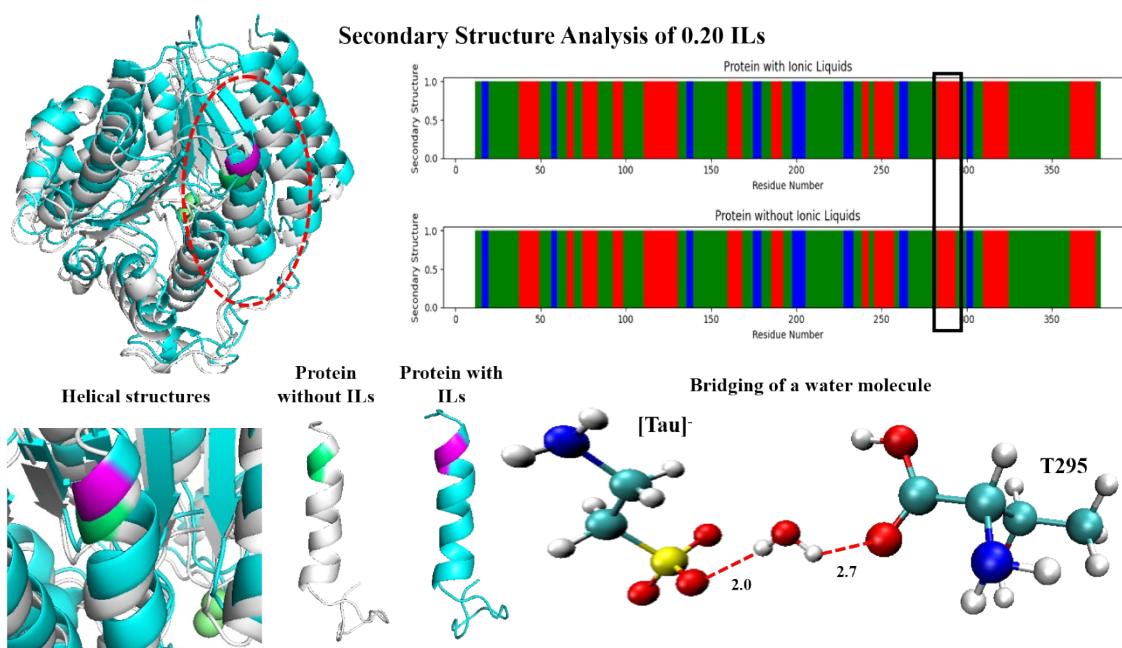

**Fig. S19** Secondary Structure analysis confirms that the turn in the protein without ILs transformed into a helix.

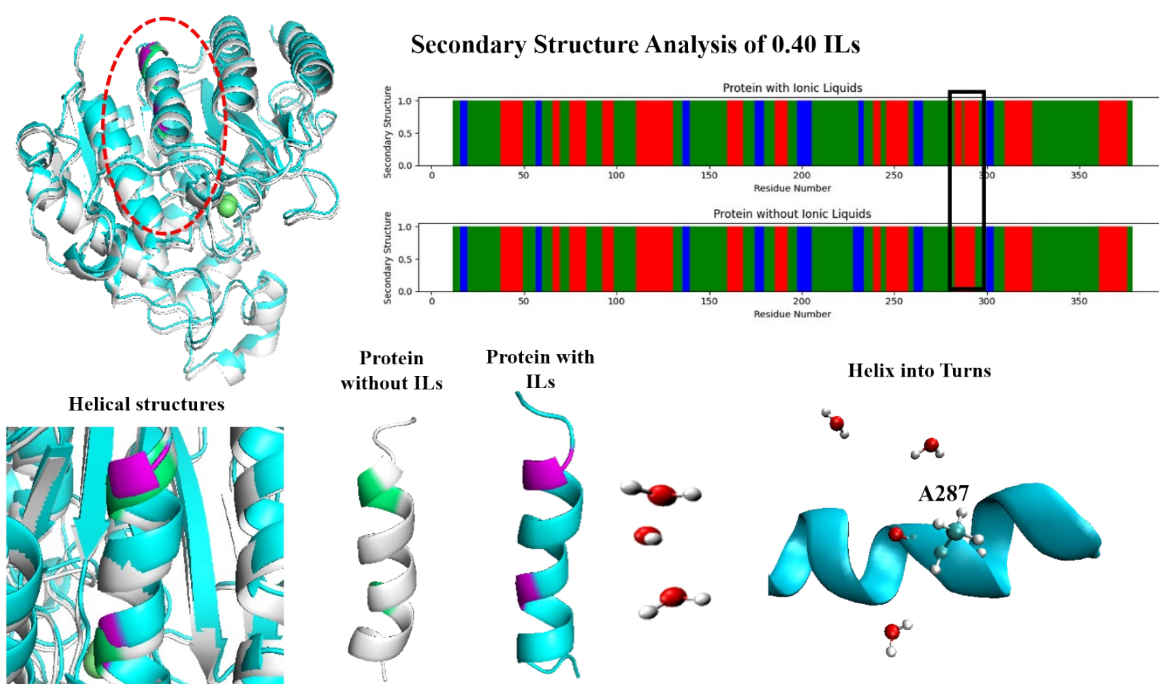

**Fig. S20** Secondary Structure analysis confirms that the helix in the protein without ILs transformed into a turn.

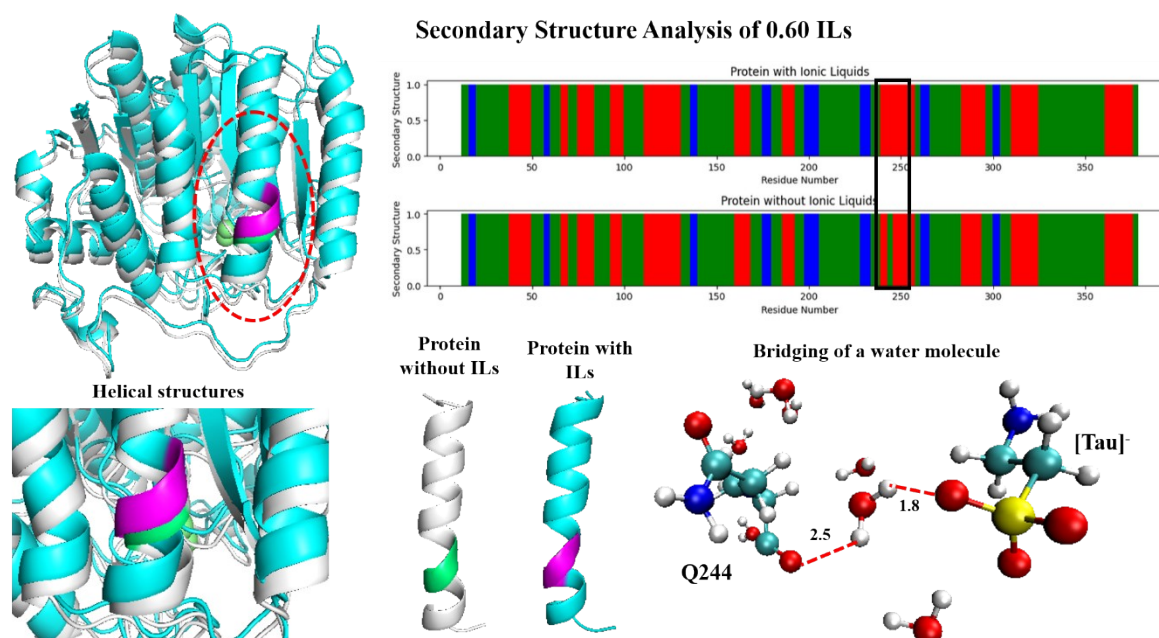

**Fig. S21** Secondary Structure analysis confirms that the turn in the protein without ILs transformed into a helix.

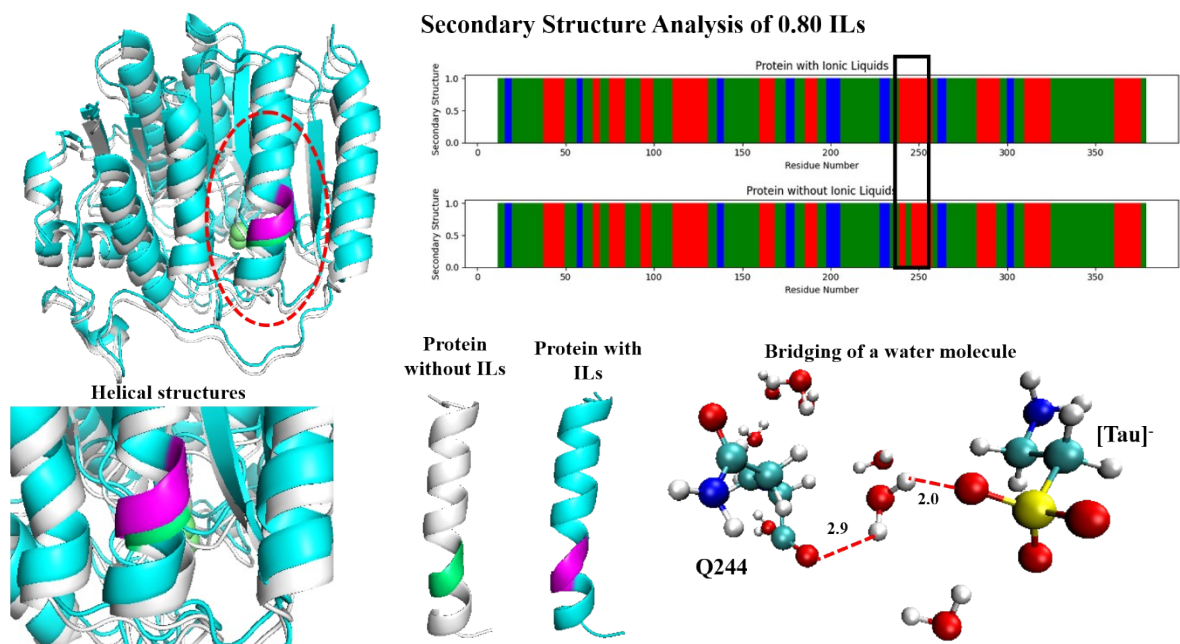

**Fig. S22** Secondary Structure analysis confirms that the turn in the protein without ILs transformed into a helix.

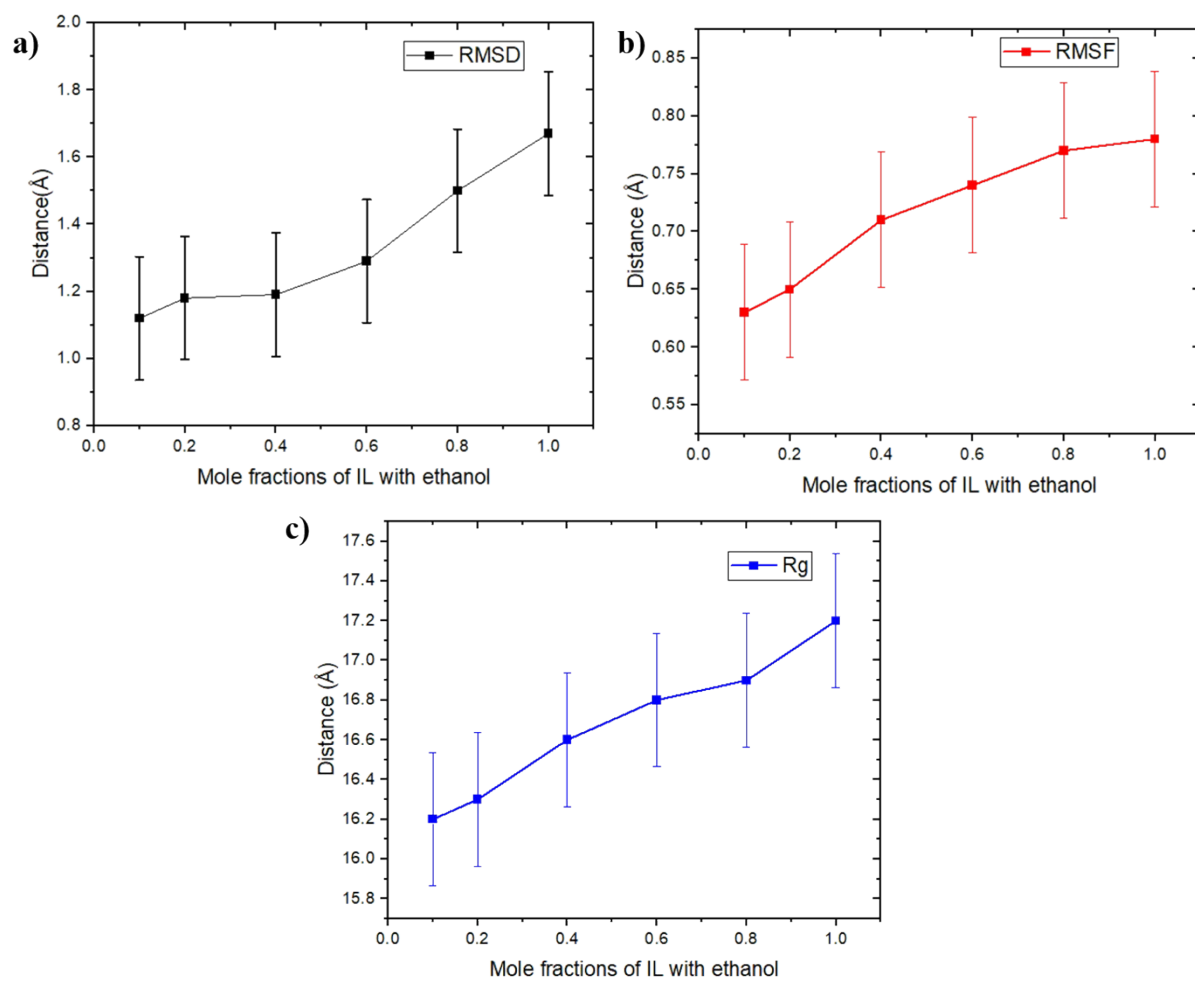

At lower mole fractions of ethanol (up to 0.40), the system maintains balanced interactions, resulting in lower RMSD values. H-bonding between ethanol and IL components stabilizes the structure. Ethanol forms H-bonds with both the [Cho]<sup>+</sup> and the [Tau]<sup>-</sup>, acting as a mediator between them. The components are well-solvated, maintaining a stable configuration, resulting in low RMSD values. Over 0.60-mole fraction of ethanol can destabilize H-bonding capacity by weakening IL interaction networks. Elevated mole fractions could result in a structural reorganization, which would create ethanol–water clusters and lessen the interaction with IL ions. Molecular overcrowding effects restrict molecular mobility, leading to conformational changes and increased RMSD values.

**Fig. S23** The average plots of different mole fractions of ILs with ethanol (a) RMSD plot, (b) RMSF plot, and (c) Rg plot.

**Table S1.** The binding energy of the ILs -Water systems with dispersion correction by DFT studies.

| $W_{n=0-5}$           | [Cho][Tau] IL |                      |                          |
|-----------------------|---------------|----------------------|--------------------------|
|                       | $N_{HB}$      | M06-2X<br>(kcal/mol) | M06-2X +D3<br>(kcal/mol) |
| <b>n = 0</b>          | 2             | -95.98               | -96.57                   |
| <b>W<sub>1a</sub></b> | 3             | -117.55              | -118.18                  |
| <b>W<sub>1b</sub></b> | 3             | -113.55              | -114.48                  |
| <b>W<sub>2a</sub></b> | 5             | -128.25              | -129.46                  |
| <b>W<sub>2b</sub></b> | 4             | -125.01              | -126.18                  |
| <b>W<sub>3a</sub></b> | 6             | -141.41              | -142.96                  |
| <b>W<sub>3b</sub></b> | 5             | -138.13              | -139.67                  |
| <b>W<sub>4a</sub></b> | 8             | -152.59              | -154.52                  |
| <b>W<sub>4b</sub></b> | 7             | -151.55              | -153.59                  |
| <b>W<sub>5a</sub></b> | 10            | -167.67              | -169.92                  |
| <b>W<sub>5b</sub></b> | 9             | -165.46              | -167.71                  |



**Table S2.** The values of the computed total electron density ( $\rho(r_c)$ ) and the total Laplacian electron density ( $\nabla^2\rho(r_c)$ ) for each complex.

| $W_{n=0-5}$           | [Cho][Tau]             |                                |
|-----------------------|------------------------|--------------------------------|
|                       | $(\rho(r_c))$<br>(a.u) | $(\nabla^2\rho(r_c))$<br>(a.u) |
| <b>n = 0</b>          | 0.0832                 | 0.0716                         |
| <b>W<sub>1a</sub></b> | 0.1414                 | 0.1288                         |
| <b>W<sub>1b</sub></b> | 0.1238                 | 0.1132                         |
| <b>W<sub>2a</sub></b> | 0.2073                 | 0.1861                         |
| <b>W<sub>2b</sub></b> | 0.1521                 | 0.1415                         |
| <b>W<sub>3a</sub></b> | 0.2216                 | 0.2148                         |
| <b>W<sub>3b</sub></b> | 0.218                  | 0.1977                         |
| <b>W<sub>4a</sub></b> | 0.2671                 | 0.2457                         |
| <b>W<sub>4b</sub></b> | 0.2361                 | 0.2162                         |
| <b>W<sub>5a</sub></b> | 0.3295                 | 0.2996                         |
| <b>W<sub>5b</sub></b> | 0.2493                 | 0.2278                         |

**Table S3.** The chemical reactivity descriptors for the IL -Water systems.

| $W_{n=0-5}$ | [Cho][Tau] IL |           |                 |                                |                             |                                   |                          |                   |                                     |                                   |                            |
|-------------|---------------|-----------|-----------------|--------------------------------|-----------------------------|-----------------------------------|--------------------------|-------------------|-------------------------------------|-----------------------------------|----------------------------|
|             | HOMO (eV)     | LUMO (eV) | Energy Gap (eV) | Ionization Potential (IP) (eV) | Electron Affinity (EA) (eV) | Chemical Potential ( $\mu$ ) (eV) | Hardness ( $\eta$ ) (eV) | Softness (S) (eV) | Electropositivity ( $\omega$ ) (eV) | Electronegativity ( $\chi$ ) (eV) | Fermi Level ( $E_f$ ) (eV) |
| $n = 0$     | -7.7941       | -0.7934   | 7.0007          | 7.7941                         | 0.7934                      | -4.2937                           | 3.5003                   | 1.75017           | 32.2667                             | 4.29375                           | -4.2937                    |
| $W_{1a}$    | -8.0330       | -0.5613   | 7.4717          | 8.0330                         | 0.5613                      | -4.2971                           | 3.7358                   | 1.86792           | 34.4921                             | 4.29715                           | -4.2971                    |
| $W_{1b}$    | -8.0390       | -0.5464   | 7.4926          | 8.0390                         | 0.5464                      | -4.2927                           | 3.7463                   | 1.87315           | 34.5170                             | 4.2927                            | -4.2927                    |
| $W_{2a}$    | -8.1674       | -0.5646   | 7.6028          | 8.1674                         | 0.5646                      | -4.3660                           | 3.8014                   | 1.9007            | 36.2310                             | 4.366                             | -4.366                     |
| $W_{2b}$    | -8.1655       | -0.6590   | 7.5065          | 8.1655                         | 0.6590                      | -4.4122                           | 3.7532                   | 1.8766            | 36.5340                             | 4.41225                           | -4.4122                    |
| $W_{3a}$    | -8.3640       | -0.5594   | 7.8046          | 8.3640                         | 0.5594                      | -4.4617                           | 3.9023                   | 1.9511            | 38.8410                             | 4.4617                            | -4.4617                    |
| $W_{3b}$    | -8.3402       | -0.4764   | 7.8638          | 8.3402                         | 0.4764                      | -4.4083                           | 3.9319                   | 1.9659            | 38.2045                             | 4.4083                            | -4.4083                    |
| $W_{4a}$    | -8.3530       | -0.4310   | 7.9220          | 8.3530                         | 0.4310                      | -4.3920                           | 3.961                    | 1.9805            | 38.2031                             | 4.392                             | -4.392                     |
| $W_{4b}$    | -8.5163       | -0.4166   | 8.0997          | 8.5163                         | 0.4166                      | -4.4664                           | 4.0498                   | 2.0249            | 40.3955                             | 4.46645                           | -4.4664                    |
| $W_{5a}$    | -8.3792       | -0.3572   | 8.0223          | 8.3792                         | 0.3572                      | -4.3682                           | 4.011                    | 2.0055            | 38.2672                             | 4.3682                            | -4.3682                    |
| $W_{5b}$    | -8.5987       | -0.4478   | 8.1509          | 8.5987                         | 0.4478                      | -4.52325                          | 4.0754                   | 2.0377            | 41.6914                             | 4.52325                           | -4.52325                   |

**Table S4.** The average values of RMSD, RMSF, and Rg of apoprotein with water and different mole fractions of ILs.

| S. No | Mole Fraction of ILs | RMSD (Å) |       |       |         | RMSF (Å) |       |       |         | Rg (Å) |       |       |         |
|-------|----------------------|----------|-------|-------|---------|----------|-------|-------|---------|--------|-------|-------|---------|
|       |                      | Run 1    | Run 2 | Run 3 | Average | Run 1    | Run 2 | Run 3 | Average | Run 1  | Run 2 | Run 3 | Average |
| 1.    | Protein-water        | 1.47     | 1.45  | 1.46  | 1.46    | 0.81     | 0.80  | 0.82  | 0.81    | 20.25  | 20.24 | 20.27 | 20.25   |
| 2.    | 0.20                 | 1.63     | 1.10  | 1.54  | 1.42    | 0.80     | 0.87  | 0.67  | 0.78    | 20.22  | 20.21 | 20.23 | 20.22   |
| 3.    | 0.40                 | 1.33     | 1.24  | 1.39  | 1.32    | 0.79     | 0.74  | 0.70  | 0.74    | 20.23  | 20.25 | 20.24 | 20.24   |
| 4.    | 0.60                 | 1.32     | 1.03  | 1.23  | 1.19    | 0.74     | 0.73  | 0.63  | 0.70    | 20.21  | 20.22 | 20.23 | 20.22   |
| 5.    | 0.80                 | 1.18     | 1.56  | 1.29  | 1.34    | 0.68     | 0.65  | 0.78  | 0.71    | 20.22  | 20.20 | 20.21 | 20.21   |
| 6.    | 1.00                 | 1.19     | 1.18  | 1.16  | 1.17    | 0.66     | 0.69  | 0.68  | 0.67    | 20.14  | 20.12 | 20.13 | 20.13   |

**Table S5.** The quantity of water molecules and [Cho]<sup>+</sup>[Tau]<sup>-</sup> ILs that accumulated on HDAC2's first solvation shell.

| S. No | Mole Fraction of ILs | Accumulation on the HDAC2 Surface |                    |       | R[Cho] <sup>+</sup> | R[Tau] <sup>-</sup> |
|-------|----------------------|-----------------------------------|--------------------|-------|---------------------|---------------------|
|       |                      | [Cho] <sup>+</sup>                | [Tau] <sup>-</sup> | Water |                     |                     |
| 1.    | 0.20                 | 21                                | 25                 | 3645  | 0.863               | 0.789               |
| 2.    | 0.40                 | 40                                | 45                 | 3069  | 1.022               | 1.112               |
| 3.    | 0.60                 | 51                                | 55                 | 2949  | 0.747               | 0.810               |
| 4.    | 0.80                 | 68                                | 71                 | 2778  | 0.730               | 0.701               |
| 5.    | 1.00                 | 82                                | 99                 | 2111  | 0.938               | 0.792               |

**Table S6.** The average value of the H-bonds between HDAC2 and different mole fractions of [Cho]<sup>+</sup>[Tau]<sup>-</sup> ILs.

| S. No. | Mole fractions of ILs | Number of H-bonds        |                          |                                             |
|--------|-----------------------|--------------------------|--------------------------|---------------------------------------------|
|        |                       | HDAC2-[Cho] <sup>+</sup> | HDAC2-[Tau] <sup>-</sup> | HDAC2-[Cho] <sup>+</sup> [Tau] <sup>-</sup> |
| 1.     | 0.20                  | 19.20                    | 32.52                    | 41.64                                       |
| 2.     | 0.40                  | 20.40                    | 48.94                    | 64.95                                       |
| 3.     | 0.60                  | 21.90                    | 59.70                    | 80.73                                       |
| 4.     | 0.80                  | 24.90                    | 69.93                    | 94.85                                       |
| 5.     | 1.00                  | 29.32                    | 81.54                    | 110.48                                      |

**Table S7.** The average number of H-bonds between water and different mole fractions of [Cho]<sup>+</sup>[Tau]<sup>-</sup> ILs.

| S. No. | Mole fractions of ILs | Number of H-bonds      |                        |                                           |
|--------|-----------------------|------------------------|------------------------|-------------------------------------------|
|        |                       | Wat-[Cho] <sup>+</sup> | Wat-[Tau] <sup>-</sup> | Wat-[Cho] <sup>+</sup> [Tau] <sup>-</sup> |
| 1.     | 0.20                  | 402.79                 | 764.35                 | 1025.82                                   |
| 2.     | 0.40                  | 497.65                 | 1476.58                | 1974.47                                   |
| 3.     | 0.60                  | 705.75                 | 2129.85                | 2835.65                                   |
| 4.     | 0.80                  | 885.50                 | 2712.95                | 3598.46                                   |
| 5.     | 1.00                  | 1024.50                | 3212.45                | 4236.58                                   |

**Table S8.** The average number of H-bonds between HDAC2 and water.

| S. No. | Mole fractions of ILs | Number of H-bonds between HDAC2-Wat |
|--------|-----------------------|-------------------------------------|
| 1.     | 0                     | 920.43                              |
| 2.     | 0.20                  | 862.54                              |
| 3.     | 0.40                  | 810.42                              |
| 4.     | 0.60                  | 775.54                              |
| 5.     | 0.80                  | 735.67                              |
| 6.     | 1.00                  | 691.43                              |

**Table S9.** The first and second peak values of RDF graphs.

| Systems | Ions             | Reference | Selection      | Distance (Å) |        | g(r)  |        |
|---------|------------------|-----------|----------------|--------------|--------|-------|--------|
|         |                  |           |                | First        | Second | First | Second |
| 0.60    | Tau <sup>-</sup> | O1        | Water<br>(COM) | 1.80         | 3.10   | 1.15  | 0.98   |
|         |                  | O2        |                | 1.80         | 3.11   | 2.07  | 1.06   |
|         |                  | O3        |                | 2.90         | 4.30   | 1.62  | 1.10   |
| 0.80    | Tau <sup>-</sup> | O1        |                | 1.82         | 3.10   | 2.17  | 1.08   |
|         |                  | O2        |                | 1.82         | 3.20   | 1.20  | 1.10   |
|         |                  | O3        |                | 2.91         | 4.30   | 1.67  | 1.12   |
| 1.00    | Tau <sup>-</sup> | O1        |                | 1.80         | 3.92   | 1.97  | 1.03   |
|         |                  | O2        |                | 1.80         | 3.10   | 1.10  | 1.30   |
|         |                  | O3        |                | 2.90         | 4.30   | 1.56  | 1.08   |

**Table S10.** The ternary mixture of ethanol and [Cho]<sup>+</sup>[Tau]<sup>-</sup> ILs in water containing HDAC2.

| System | Mole fraction | Ethanol | Choline | Taurate | Water |
|--------|---------------|---------|---------|---------|-------|
| 1      | Pro-water     | 0       | 0       | 0       | 16366 |
| 2      | Pro-ILs       | 0       | 150     | 150     | 14467 |
| 3      | 0.10          | 30      | 135     | 135     | 14539 |
| 4      | 0.20          | 60      | 120     | 120     | 14644 |
| 5      | 0.40          | 120     | 90      | 90      | 14790 |
| 6      | 0.60          | 180     | 60      | 60      | 14942 |

|   |      |     |    |    |       |
|---|------|-----|----|----|-------|
| 7 | 0.80 | 240 | 30 | 30 | 15112 |
| 8 | 1.00 | 300 | 0  | 0  | 15285 |

**Table S11.** The average values of RMSD, RMSF, and Rg of apoprotein with water, different mole fraction of ILs and ethanol.

| System | Mole fraction | RMSD (Å) | RMSF (Å) | Rg (Å) |
|--------|---------------|----------|----------|--------|
| 1      | Pro-water     | 1.29     | 0.69     | 16.5   |
| 2      | Pro-ILs       | 1.27     | 0.64     | 16.4   |
| 3      | 0.10          | 1.12     | 0.63     | 16.2   |
| 4      | 0.20          | 1.18     | 0.65     | 16.3   |
| 5      | 0.40          | 1.19     | 0.71     | 16.6   |
| 6      | 0.60          | 1.29     | 0.74     | 16.8   |
| 7      | 0.80          | 1.50     | 0.77     | 16.9   |
| 8      | 1.00          | 1.67     | 0.78     | 17.2   |

**Table S12.** The dihedral angles phi and psi values for different mole fractions of IL.

| Mole Fractions | Residues | Conformational changes | $\phi$ (Phi) |         | $\psi$ (Psi) |         | Deviations   |              |
|----------------|----------|------------------------|--------------|---------|--------------|---------|--------------|--------------|
|                |          |                        | Without IL   | With IL | Without IL   | With IL | $\phi$ (Phi) | $\psi$ (Psi) |
| 0.20           | K294     | Turn to Helix          | -65.9°       | -73.2°  | -17.9°       | -40.0°  | -7.3°        | -22.1°       |
|                | T295     | Turn to Helix          | -73.2°       | -72.3°  | -40.0°       | -67.0°  | -0.9°        | -27.0°       |
| 0.40           | A287     | Helix to Turn          | -83.7°       | -79.4°  | -9.0°        | -13.1°  | -4.3°        | -4.1°        |
|                | K294     | Turn to Helix          | -65.9°       | -73.7°  | -17.9°       | -20.7°  | -7.8°        | -2.8°        |
| 0.60           | T295     | Turn to Helix          | -73.2°       | -69.7°  | -40.0°       | -25.5°  | -3.5°        | -14.5°       |
|                | G243     | Turn to Helix          | -70.6°       | -52.6°  | -4.9°        | -29.9°  | -18.0°       | -25°         |
| 0.80           | Q244     | Turn to Helix          | -73.7°       | -73.3°  | -28.6°       | -45.4°  | -0.4°        | -16.8°       |
|                | I245     | Turn to Helix          | -125.8°      | -115.3° | -23.2°       | -22.6°  | -10.5°       | -0.6°        |
|                | G243     | Turn to Helix          | -70.6°       | -52.6°  | -4.9°        | -27.9°  | -18.0°       | -9.9°        |
| 1.00           | Q244     | Turn to Helix          | -73.7°       | -71.3°  | -28.6°       | -45.4°  | -2.4°        | -16.8°       |
|                | I245     | Turn to Helix          | -125.8°      | -115.3° | -23.2°       | -22.6°  | -10.5°       | -0.6°        |
| 1.00           | G243     | Turn to Helix          | -70.6°       | -53.6°  | -4.9°        | -28.9°  | -17.0°       | -24.0°       |
|                | Q244     | Turn to Helix          | -73.7°       | -72.3°  | -28.6°       | -44.4°  | -1.4°        | -15.8°       |

|  |      |               |         |         |        |        |        |       |
|--|------|---------------|---------|---------|--------|--------|--------|-------|
|  | I245 | Turn to Helix | -125.8° | -114.3° | -23.2° | -21.6° | -11.5° | -1.6° |
|--|------|---------------|---------|---------|--------|--------|--------|-------|
